# Supplementary material for: Emergency Room Visits with a Non-Traumatic Dental-Related Diagnosis in Hawaii, 2016–2020
Source: MDPI journal article supplement (doi:10.3390/ijerph19053073), 2022-03-05
Supplement: s1 [file s1]

Table S3. Chi-square tests of independence for non-traumatic dental-related diagnoses and demographic factors among emergency room (ER) visits with any listed dental-related non-traumatic diagnosis: adults aged 21 years and older in Hawaii 2016–2020

|                                                   | Total: ER visits with any<br>listed non-traumatic<br>dental-related diagnosis<br>(n = 29,536) | ER visits with a principal<br>non-traumatic dental-<br>related diagnosis<br>(n = 19,691) | ER visits with a<br>secondary non-traumatic<br>dental-related diagnosis<br>(n = 9845) | P-value <sup>a</sup> |
|---------------------------------------------------|-----------------------------------------------------------------------------------------------|------------------------------------------------------------------------------------------|---------------------------------------------------------------------------------------|----------------------|
| Sex, <i>n</i> (%)                                 |                                                                                               |                                                                                          |                                                                                       |                      |
| Male                                              | 15,089 (51.1)                                                                                 | 10,129 (51.4)                                                                            | 4960 (50.4)                                                                           | 0.086                |
| Female                                            | 14,447 (48.9)                                                                                 | 9562 (48.6)                                                                              | 4885 (49.6)                                                                           |                      |
| Age, <i>n</i> (%)                                 |                                                                                               |                                                                                          |                                                                                       |                      |
| 21–44 y                                           | 16,497 (55.9)                                                                                 | 12,138 (61.6)                                                                            | 4359 (44.3)                                                                           | <0.001               |
| 45–64 y                                           | 8599 (29.1)                                                                                   | 5514 (28.0)                                                                              | 3085 (31.3)                                                                           |                      |
| 65–84 y                                           | 3704 (12.5)                                                                                   | 1782 (9.0)                                                                               | 1922 (19.5)                                                                           |                      |
| +85y                                              | 736 (2.5)                                                                                     | 257 (1.3)                                                                                | 449 (4.9)                                                                             |                      |
| Primary Payment Source, <i>n</i> (%) <sup>b</sup> |                                                                                               |                                                                                          |                                                                                       |                      |
| Medicaid                                          | 13,473 (45.6)                                                                                 | 9680 (49.2)                                                                              | 2613 (26.6)                                                                           | <0.001               |
| Private                                           | 8065 (27.3)                                                                                   | 5481 (27.8)                                                                              | 3793 (38.5)                                                                           |                      |
| Medicare                                          | 5200 (17.6)                                                                                   | 2587 (13.1)                                                                              | 2584 (26.3)                                                                           |                      |
| Self-pay                                          | 1923 (6.5)                                                                                    | 1406 (7.1)                                                                               | 517 (5.3)                                                                             |                      |
| Other                                             | 861 (2.9)                                                                                     | 528 (2.7)                                                                                | 333 (3.4)                                                                             |                      |
| Race/Ethnicity, <i>n</i> (%) <sup>b</sup>         |                                                                                               |                                                                                          |                                                                                       |                      |
| White                                             | 8608 (29.4)                                                                                   | 5738 (29.5)                                                                              | 2870 (29.4)                                                                           | <0.001               |
| Native Hawaiian (NH)/Part NH                      | 6897 (23.6)                                                                                   | 5018 (25.8)                                                                              | 1879 (19.2)                                                                           |                      |
| Pacific Islander                                  | 3177 (10.9)                                                                                   | 2182 (11.2)                                                                              | 995 (10.2)                                                                            |                      |
| Filipino                                          | 3586 (12.3)                                                                                   | 2234 (11.5)                                                                              | 1352 (13.8)                                                                           |                      |
| Japanese                                          | 1994 (6.8)                                                                                    | 1018 (5.2)                                                                               | 976 (10.0)                                                                            |                      |
| Other Asian                                       | 1542 (5.3)                                                                                    | 865 (4.4)                                                                                | 677 (6.9)                                                                             |                      |
| Other race                                        | 3448 (11.8)                                                                                   | 2427 (12.5)                                                                              | 1021 (10.5)                                                                           |                      |

<sup>a</sup> P-values were obtained from chi-squared tests of independence to examine the relationships between non-traumatic dental-related diagnoses (principal or secondary only) and sociodemographic factors in the US. <sup>b</sup>

Percentage was obtained after excluding emergency room visits with a missing value of the variable (Primary Payment Source: *n*=14, 0.04%; Race/ethnicity: *n*=433, 1.2%).
