# Supplementary material for: Emergency Room Visits with a Non-Traumatic Dental-Related Diagnosis in Hawaii, 2016–2020
Source: MDPI journal article supplement (doi:10.3390/ijerph19053073), 2022-03-05
Supplement: s1 [file s1]

Table S2. Descriptive analysis of emergency room (ER) visits with any listed non-traumatic dental-related (NTDR) diagnosis: adults aged 21 years and older in Hawaii 2016–2020

|                                                                            | Total<br>(2016-2020) | Year        |             |             |             |             |
|----------------------------------------------------------------------------|----------------------|-------------|-------------|-------------|-------------|-------------|
|                                                                            | 2016                 | 2017        | 2018        | 2019        | 2020        |             |
| Emergency room visits with any listed diagnosis, <i>n</i> (%) <sup>a</sup> | 29,536               | 6051 (20.5) | 6475 (21.9) | 6114 (20.3) | 5992 (20.3) | 4904 (16.6) |
| Sex, <i>n</i> (%) <sup>b</sup>                                             |                      |             |             |             |             |             |
| Male                                                                       | 15,089 (51.1)        | 1990 (49.6) | 2237 (51.5) | 2083 (50.8) | 2120 (52.2) | 1699 (53.6) |
| Female                                                                     | 14,447 (48.9)        | 2019 (50.4) | 2108 (48.5) | 2020 (49.2) | 1943 (47.8) | 1472 (46.4) |
| Age, <i>n</i> (%) <sup>b</sup>                                             |                      |             |             |             |             |             |
| 21–44 y                                                                    | 16,497 (55.9)        | 3490 (57.7) | 3800 (58.7) | 3457 (56.5) | 3222 (53.8) | 2528 (51.5) |
| 45–64 y                                                                    | 8599 (29.1)          | 1785 (29.5) | 1786 (27.6) | 1765 (28.9) | 1761 (29.4) | 1502 (30.6) |
| 65–84 y                                                                    | 3704 (12.5)          | 639 (10.6)  | 719 (11.1)  | 750 (12.3)  | 868 (14.5)  | 728 (14.8)  |
| +85 y                                                                      | 736 (2.5)            | 137 (2.3)   | 170 (2.6)   | 142 (2.3)   | 141 (2.4)   | 146 (3.0)   |
| County of Residence, <i>n</i> (%) <sup>b</sup>                             |                      |             |             |             |             |             |
| Honolulu                                                                   | 18,126 (61.4)        | 3728 (61.6) | 3930 (60.7) | 3709 (60.7) | 3679 (61.4) | 3080 (62.8) |
| Hawaii Island                                                              | 6015 (20.4)          | 1179 (19.5) | 1332 (20.6) | 1250 (20.4) | 1282 (21.4) | 972 (19.8)  |
| Maui                                                                       | 2961 (10.0)          | 627 (10.4)  | 646 (10.0)  | 614 (10.0)  | 587 (9.8)   | 487 (9.9)   |
| Kauai                                                                      | 2434 (8.2)           | 517 (8.5)   | 567 (8.8)   | 541 (8.8)   | 444 (7.4)   | 365 (7.4)   |
| Primary Payment Source, <i>n</i> (%) <sup>b</sup>                          |                      |             |             |             |             |             |
| Medicaid                                                                   | 13,473 (45.6)        | 2922 (48.3) | 3022 (46.7) | 2786 (45.6) | 2503 (41.8) | 2240 (45.7) |
| Private                                                                    | 8065 (27.3)          | 1619 (26.8) | 1775 (27.4) | 1714 (28.0) | 1647 (27.5) | 1310 (26.7) |
| Medicare                                                                   | 5200 (17.6)          | 1007 (16.6) | 1109 (17.1) | 1014 (16.6) | 1167 (19.5) | 903 (18.4)  |
| Self-pay                                                                   | 1923 (6.5)           | 312 (5.2)   | 388 (6.0)   | 423 (6.9)   | 482 (8.1)   | 318 (6.5)   |
| Other                                                                      | 861 (2.9)            | 189 (3.1)   | 181 (2.8)   | 175 (2.9)   | 188 (3.1)   | 128 (2.6)   |
| Race/Ethnicity, <i>n</i> (%) <sup>b</sup>                                  |                      |             |             |             |             |             |
| White                                                                      | 8608 (29.4)          | 1828 (30.5) | 1878 (29.2) | 1762 (29.1) | 1740 (29.4) | 1400 (28.8) |
| Native Hawaiian (NH)/Part NH                                               | 6897 (23.6)          | 1431 (23.8) | 1557 (24.2) | 1371 (22.7) | 1379 (23.3) | 1159 (23.9) |
| Pacific Islander                                                           | 3177 (10.9)          | 617 (10.3)  | 728 (11.3)  | 657 (10.9)  | 670 (11.3)  | 505 (10.4)  |
| Filipino                                                                   | 3586 (12.3)          | 742 (12.4)  | 758 (11.8)  | 773 (12.8)  | 696 (11.7)  | 617 (12.7)  |
| Japanese                                                                   | 1994 (6.8)           | 424 (7.1)   | 440 (6.9)   | 384 (6.4)   | 402 (6.8)   | 344 (7.1)   |
| Other Asian                                                                | 1542 (5.3)           | 289 (4.8)   | 307 (4.8)   | 323 (5.3)   | 328 (5.5)   | 295 (6.1)   |
| Other race                                                                 | 3448 (11.8)          | 669 (11.2)  | 754 (11.7)  | 775 (12.8)  | 712 (12.0)  | 538 (11.1)  |
| Number of Patients, <i>n</i> (%) <sup>c</sup>                              |                      |             |             |             |             |             |
| Patients with one visit                                                    | 19,299 (83.4)        | 4569 (88.5) | 4983 (89.4) | 4727 (88.9) | 4696 (89.9) | 3834 (89.7) |
| Patients with >1 visits                                                    | 3839 (16.6)          | 594 (11.5)  | 592 (10.6)  | 590 (11.1)  | 438 (10.1)  | 342 (10.3)  |
| Cummulative Total Charges, M <sup>d</sup>                                  | 276.4                | 51.4        | 50.5        | 51.0        | 57.6        | 65.8        |
| Cummulative Total Charges, M <sup>e</sup>                                  | 54.7                 | 9.7         | 11.2        | 11.2        | 12.1        | 10.6        |

Cummulative Total Charges by Patient Type wih Primary Payment Source, M<sup>e</sup> (%)

|          |             |            |            |            |            |            |
|----------|-------------|------------|------------|------------|------------|------------|
| Medicaid | 21.7 (39.7) | 4.1 (42.4) | 4.4 (39.8) | 4.3 (39.0) | 4.5 (37.2) | 4.4 (40.9) |
| Private  | 16.1 (29.4) | 3.0 (31.3) | 3.2 (28.8) | 3.4 (30.8) | 3.3 (27.5) | 3.1 (29.1) |
| Medicare | 11.5 (21.1) | 1.9 (19.1) | 2.5 (22.8) | 2.2 (19.8) | 2.8 (22.8) | 2.2 (20.5) |
| Self-pay | 3.3 (6.1)   | 0.4 (4.0)  | 0.6 (5.4)  | 0.7 (6.7)  | 1.0 (8.0)  | 0.6 (5.9)  |
| Other    | 2.0 (3.7)   | 0.3 (3.3)  | 0.4 (3.2)  | 0.4 (3.7)  | 0.5 (4.5)  | 0.4 (3.5)  |

---

<sup>a</sup> Percentage of ER visits with any listed NTDR diagnosis from 2016 to 2020. <sup>b</sup> Percentage of ER visits with any listed NTDR diagnosis. <sup>c</sup> Percentage of patients who used an ER and received any listed NTDR diagnosis. <sup>d</sup> A total charge is the dollar amount the hospital billed for an ER visit with any listed NTDR diagnosis. <sup>e</sup> Cumulative total charges after excluding ER visits resulted in an inpatient admission.

---
