# Supplementary material for: Emergency Room Visits with a Non-Traumatic Dental-Related Diagnosis in Hawaii, 2016–2020
Source: MDPI journal article supplement (doi:10.3390/ijerph19053073), 2022-03-05
Supplement: s1 [file s1]

Table S4. Rates<sup>a</sup> of emergency room visits with a non-traumatic dental-related diagnosis: Adults aged 21 years and older in Hawaii 2016–2020

| Rate <sup>a</sup> (visits/100,000 persons) | Principal Diagnosis |       |       |       | Any Listed Diagnosis |        |        |       |
|--------------------------------------------|---------------------|-------|-------|-------|----------------------|--------|--------|-------|
|                                            | 2016                | 2017  | 2018  | 2019  | 2016                 | 2017   | 2018   | 2019  |
| Total                                      | 374.6               | 403.8 | 383.7 | 379.8 | 565.4                | 601.7  | 571.7  | 560.1 |
| Age                                        |                     |       |       |       |                      |        |        |       |
| 21–44 y                                    | 549.8               | 594.1 | 558.9 | 531.9 | 751.3                | 815.0  | 757.4  | 709.6 |
| 45–64 y                                    | 311.7               | 329.1 | 324.0 | 334.4 | 492.8                | 501.6  | 502.1  | 508.5 |
| 65–84 y                                    | 135.0               | 158.4 | 167.1 | 186.4 | 311.5                | 331.0  | 338.8  | 374.5 |
| +85 y                                      | 127.5               | 161.5 | 107.3 | 154.0 | 356.5                | 465.4  | 354.4  | 374.3 |
| County of Residence                        |                     |       |       |       |                      |        |        |       |
| Honolulu                                   | 308.9               | 325.5 | 313.2 | 311.3 | 501.3                | 526.9  | 502.7  | 499.7 |
| Hawaii                                     | 579.2               | 663.2 | 596.7 | 661.2 | 785.8                | 879.9  | 826.0  | 843.4 |
| Maui                                       | 391.6               | 391.5 | 369.8 | 344.2 | 510.4                | 516.1  | 486.2  | 461.3 |
| Kauai                                      | 675.5               | 788.2 | 782.7 | 604.5 | 964.8                | 1056.5 | 1003.5 | 818.3 |

<sup>a</sup> A rate is calculated using the number of emergency room visits with a principal non-traumatic dental-related diagnosis in the numerator and the Hawaii population estimate in the denominator. The Hawaii population estimate was derived from the American Community Survey [16].
